# Supplementary material for: Alpha-to-beta cell trans-differentiation for treatment of diabetes
Source: Oxford University Press journal article supplement (doi:10.1042/bst20210244), 2021-12-09
Supplement: bst-2021-0244c_supp.pdf [file bst-2021-0244c_supp.pdf]

Funding: This work was partially supported by NIDDK funding to GG (RO1DK111460).
